# Supplementary material for: AgOC(CF3)3: an alternative and efficient reagent for preparing transition metal-NHC-carbene complexes
Source: Royal Society of Chemistry journal article supplement (doi:10.1039/b900136k), 2009-01-01

**Supporting Information**

**for**

**AgOC(CF<sub>3</sub>)<sub>3</sub>: An Alternative and Efficient Reagent for Preparing Transition Metal-NHC-Carbene Complexes**

**Tarun Kumar Maishal, Jean-Marie Basset, Malika Boualleg, Christophe Copéret, Laurent Veyre, and Chloé Thieuleux\***

Université de Lyon, Institut de Chimie de Lyon, C2P2 – Equipe COMS (UMR 5265 CNRS – CPE Lyon – Université de Lyon 1), CPE Lyon, 43 Bd du 11 Novembre 1918 F-69616 Villeurbanne Cedex, France.

**General Information.** Elemental analyses were performed at the microanalysis center in Dijon and Vernaison, France. High resolution Mass spectrometry experiments were performed in the “Centre Commun de Spectrométrie de Masse”, ICBMS UMR 5246, CNRS-Université Claude Bernard Lyon 1, Université de Lyon, C.P.E. Lyon-Bâtiment 308D, in France. Liquid state NMR spectra were recorded using a Bruker AC 300.

**<sup>1</sup>H-NMR of 2a:**

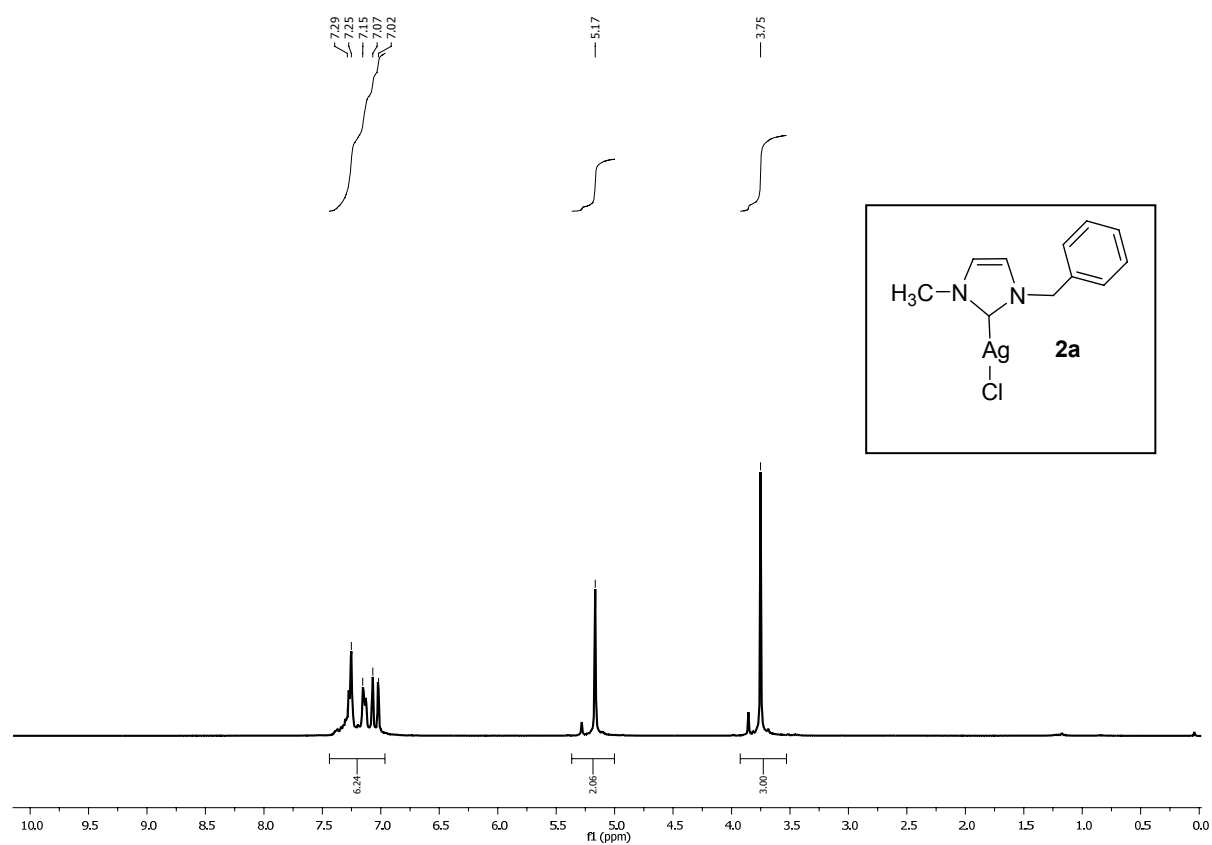

**<sup>13</sup>C-NMR of 2a:**

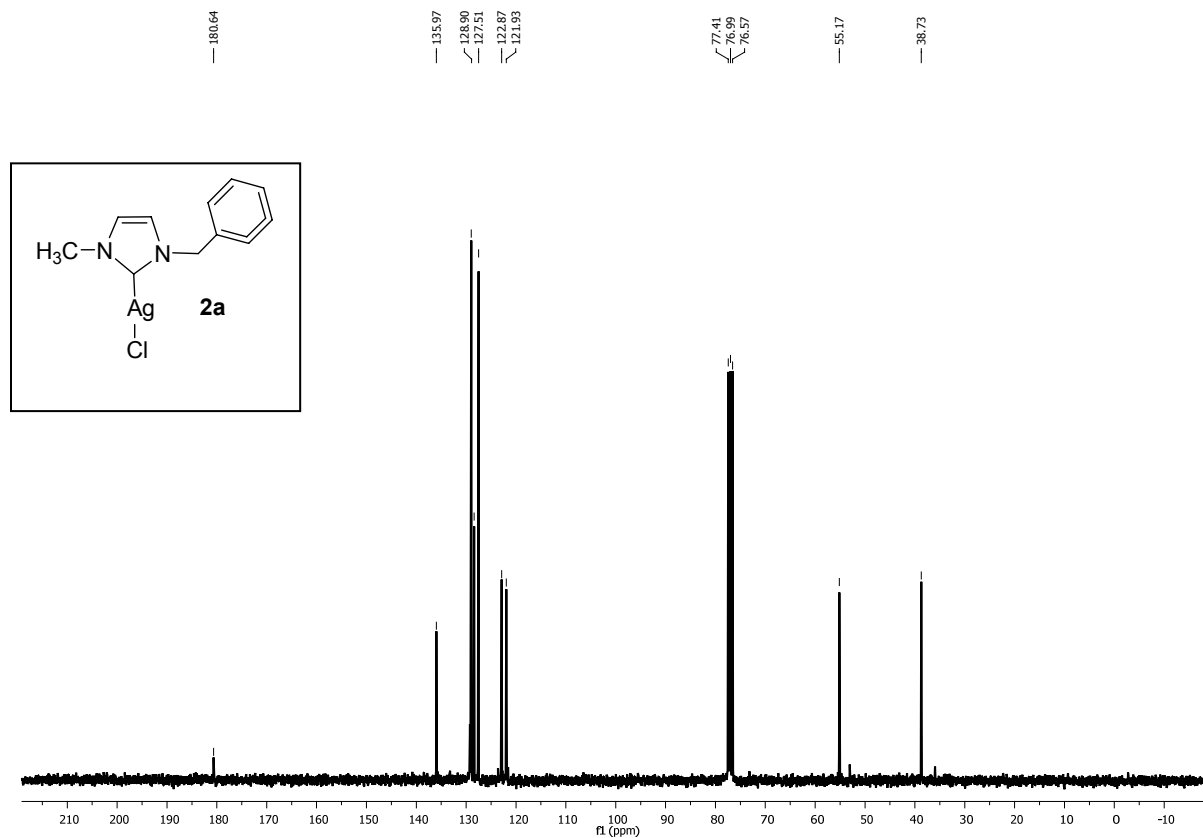

**<sup>1</sup>H-NMR of 2b:**

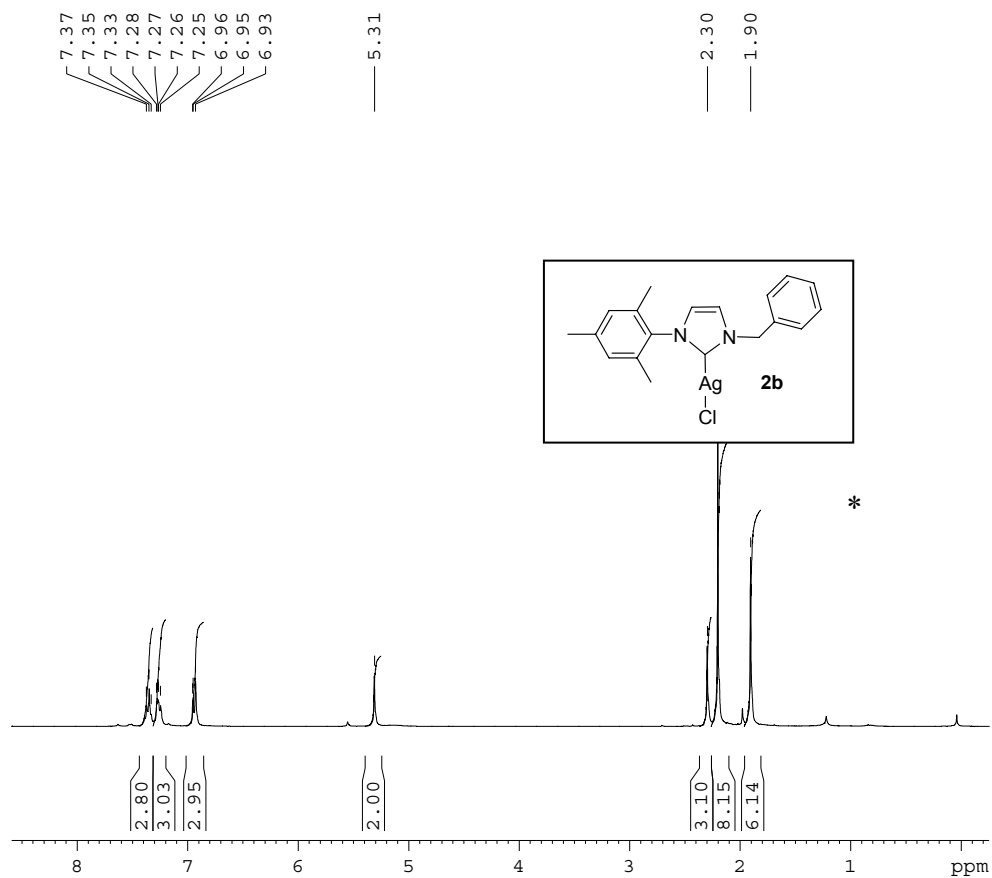

**$^{13}\text{C}$ -NMR of 2b:**

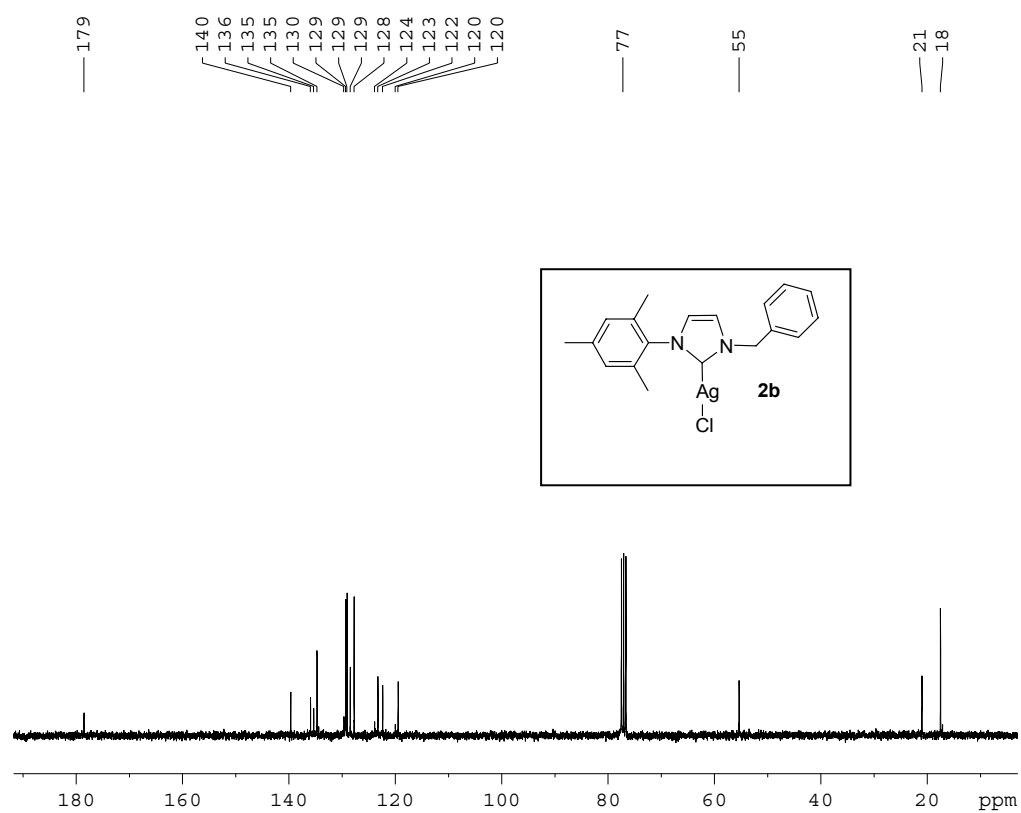

**$^1\text{H}$ -NMR of 2c:**

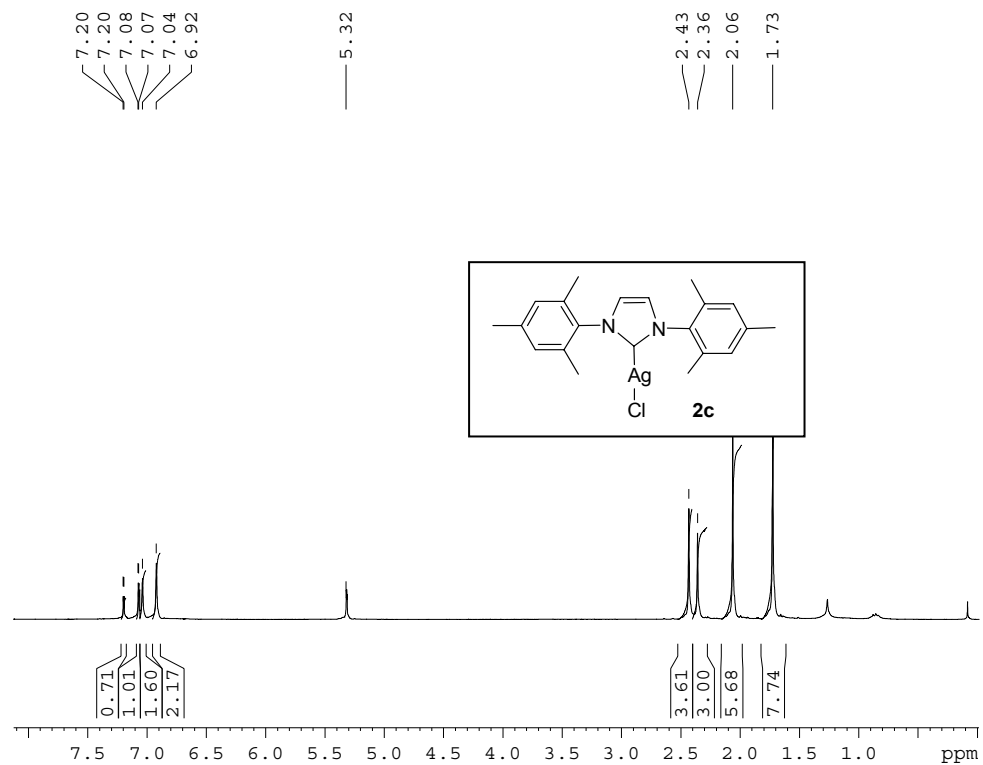

<sup>13</sup>C-NMR of **2c**:

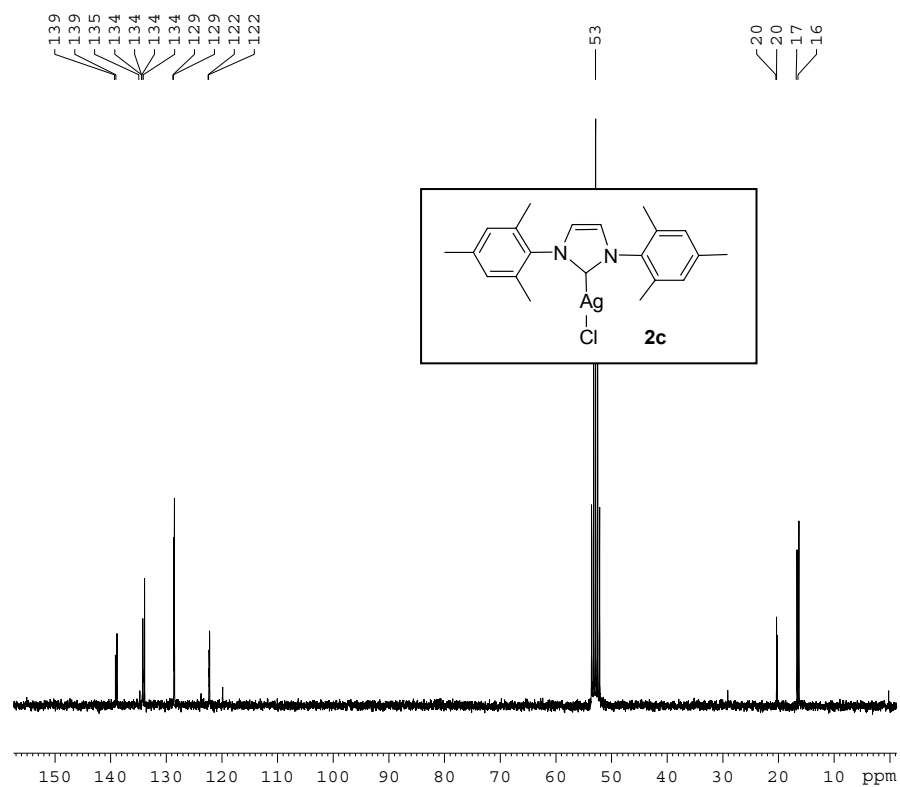

**<sup>1</sup>H-NMR of 3:**

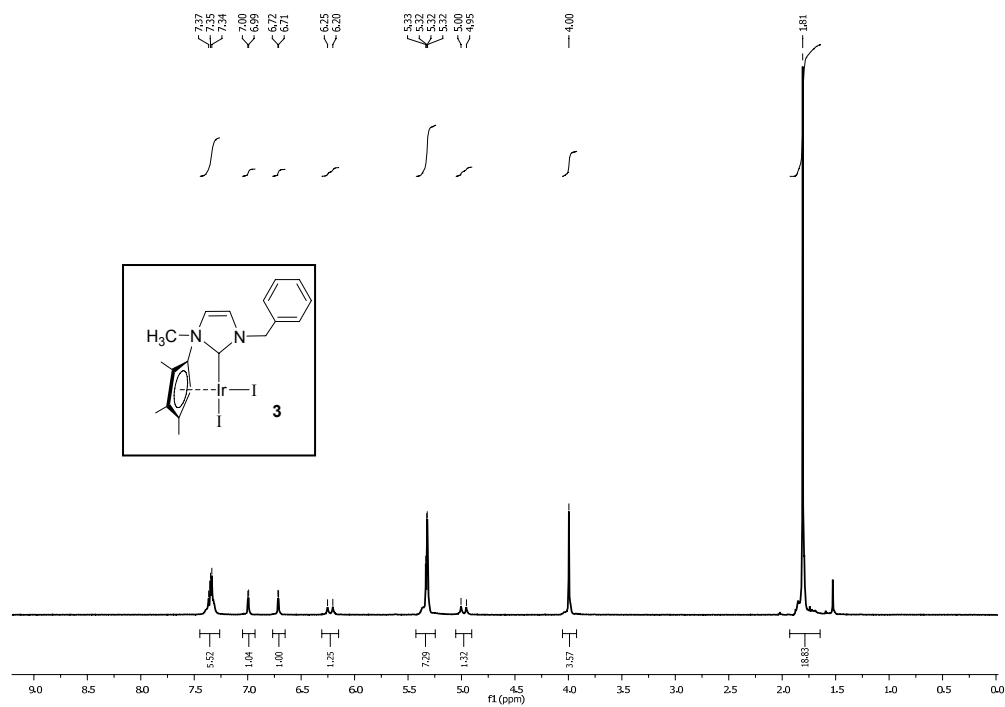

**<sup>13</sup>C-NMR of 3:**

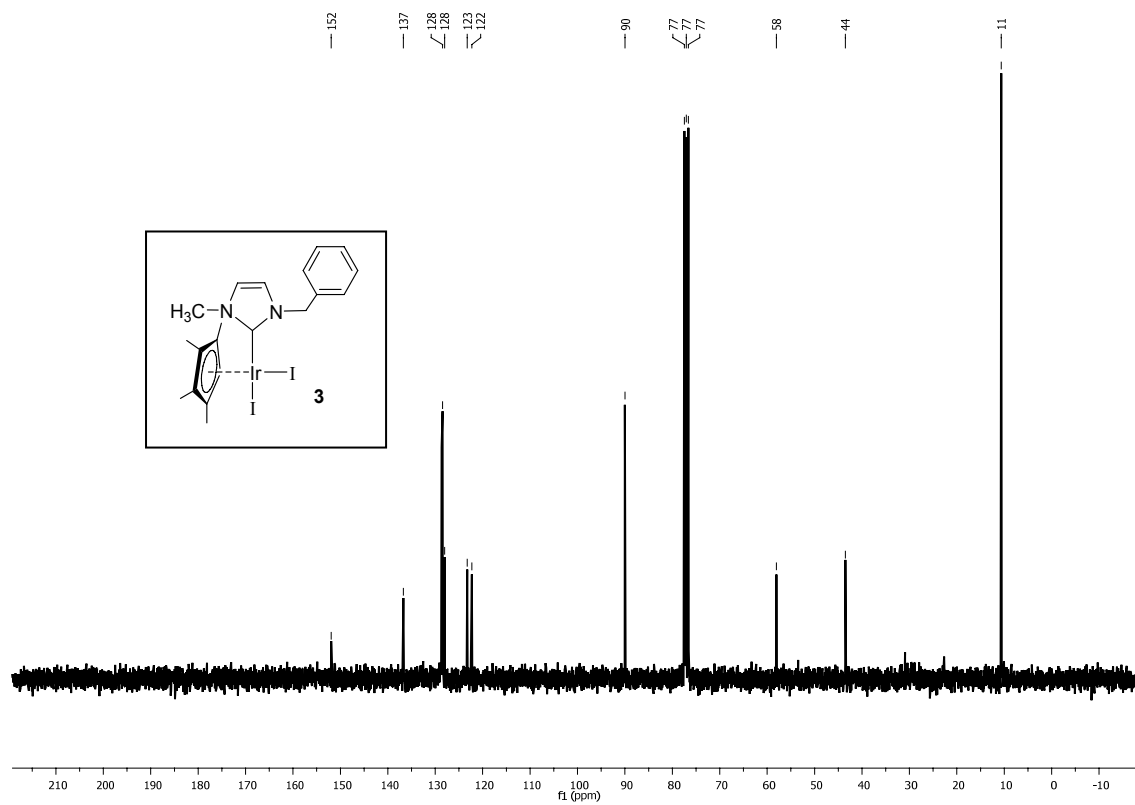



**<sup>1</sup>H-NMR of 4:**

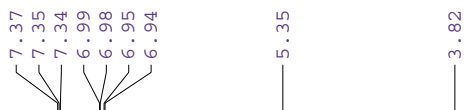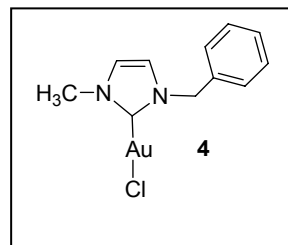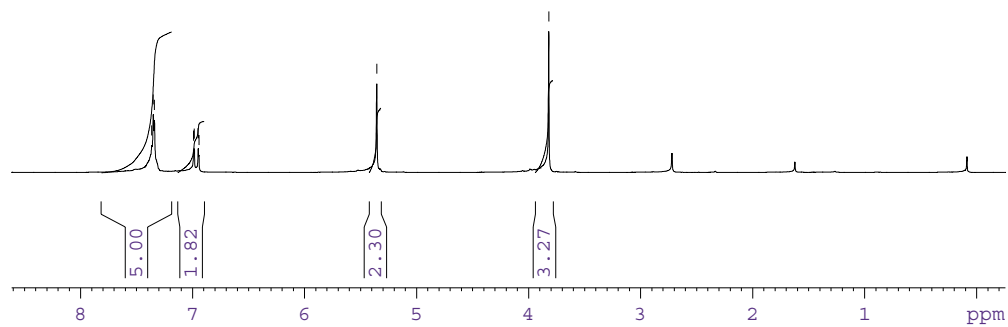

**<sup>13</sup>C-NMR of 4:**

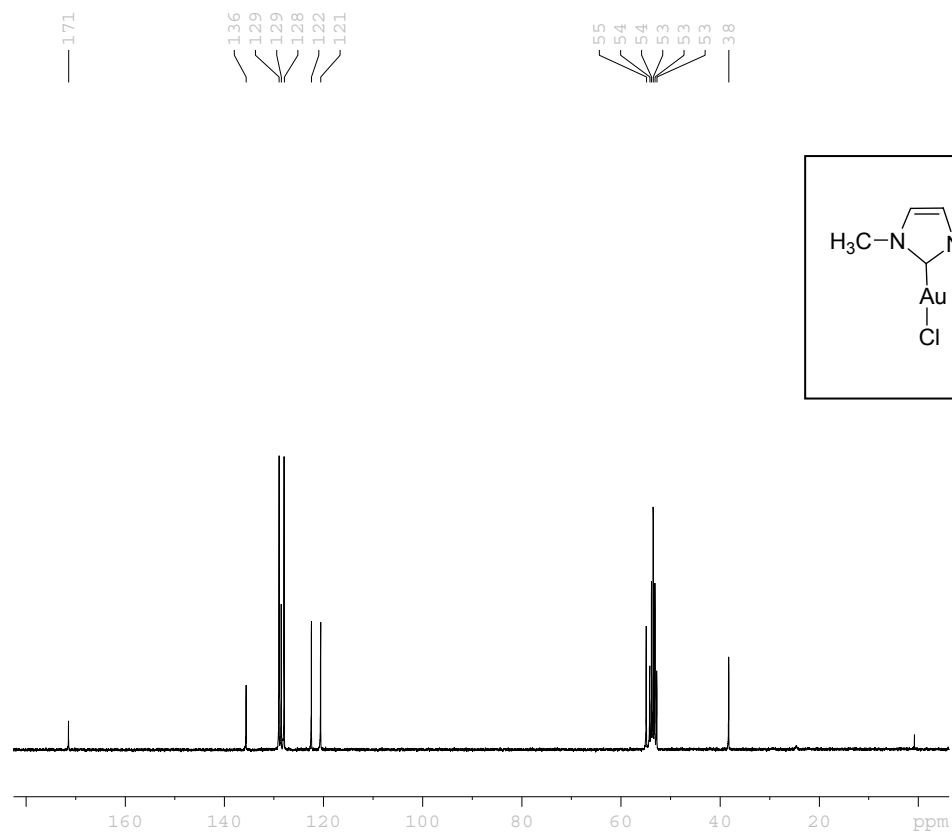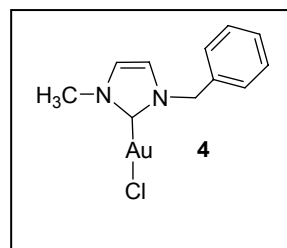

**<sup>1</sup>H-NMR of 5:**

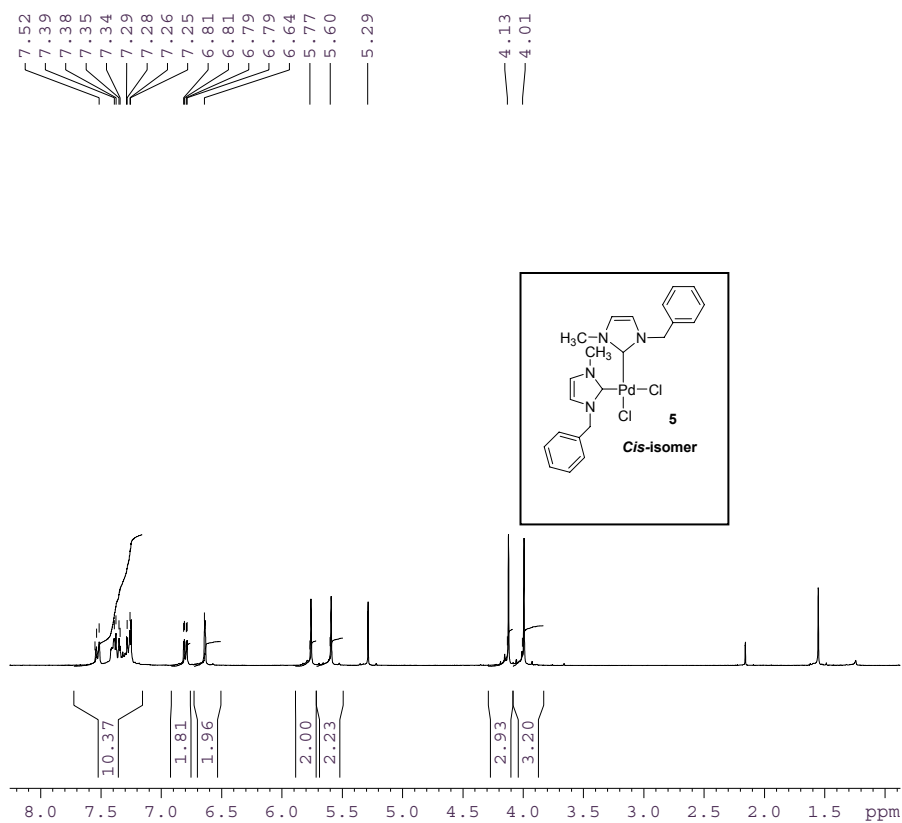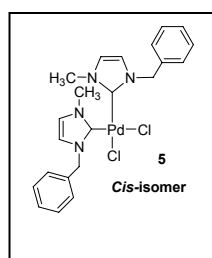

**$^{13}\text{C}$ -NMR of 5:**

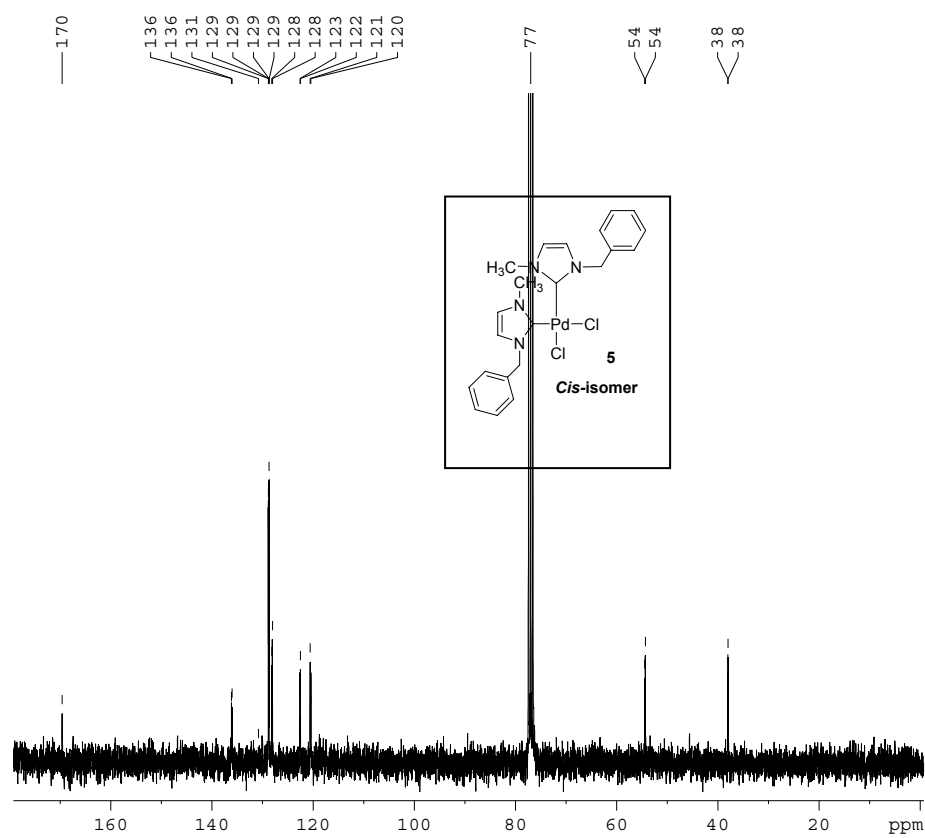

**$^1\text{H}$ -NMR of 6:**

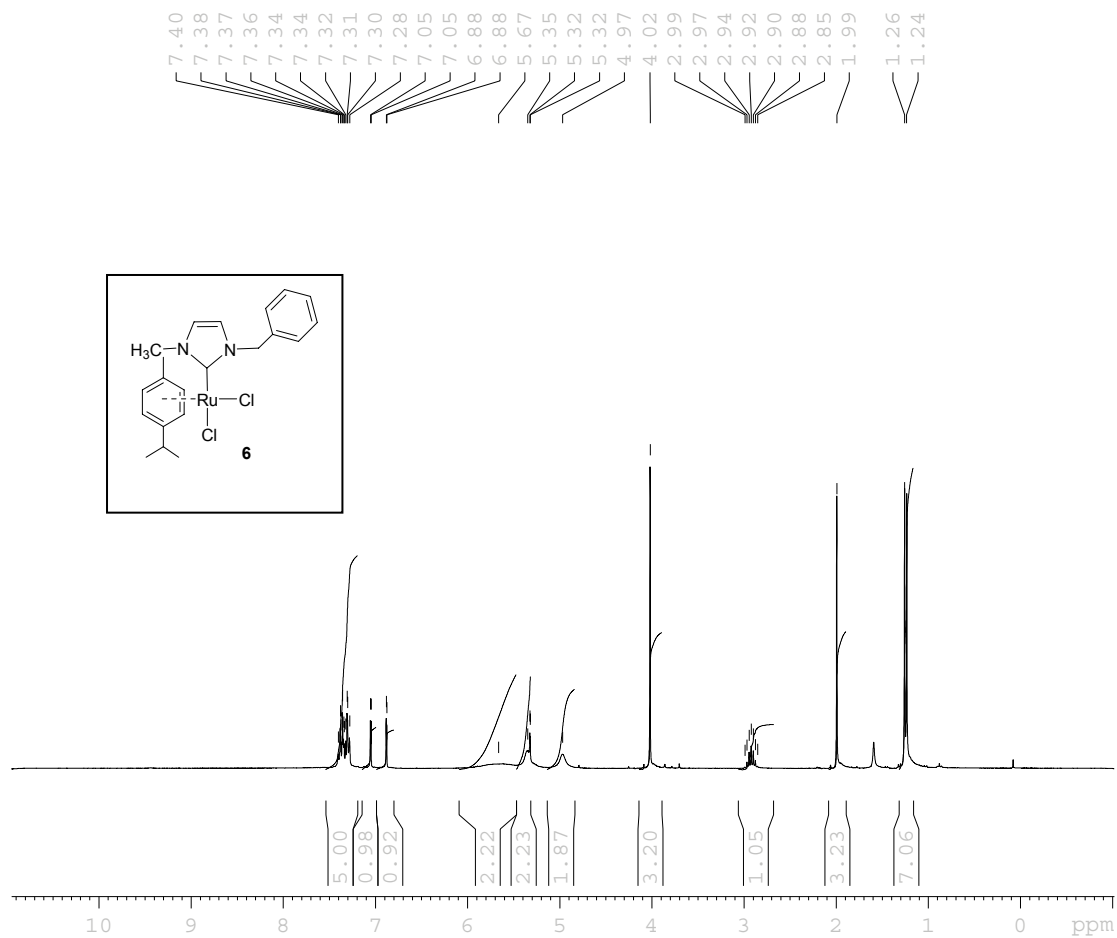

<sup>13</sup>C-NMR of 6:

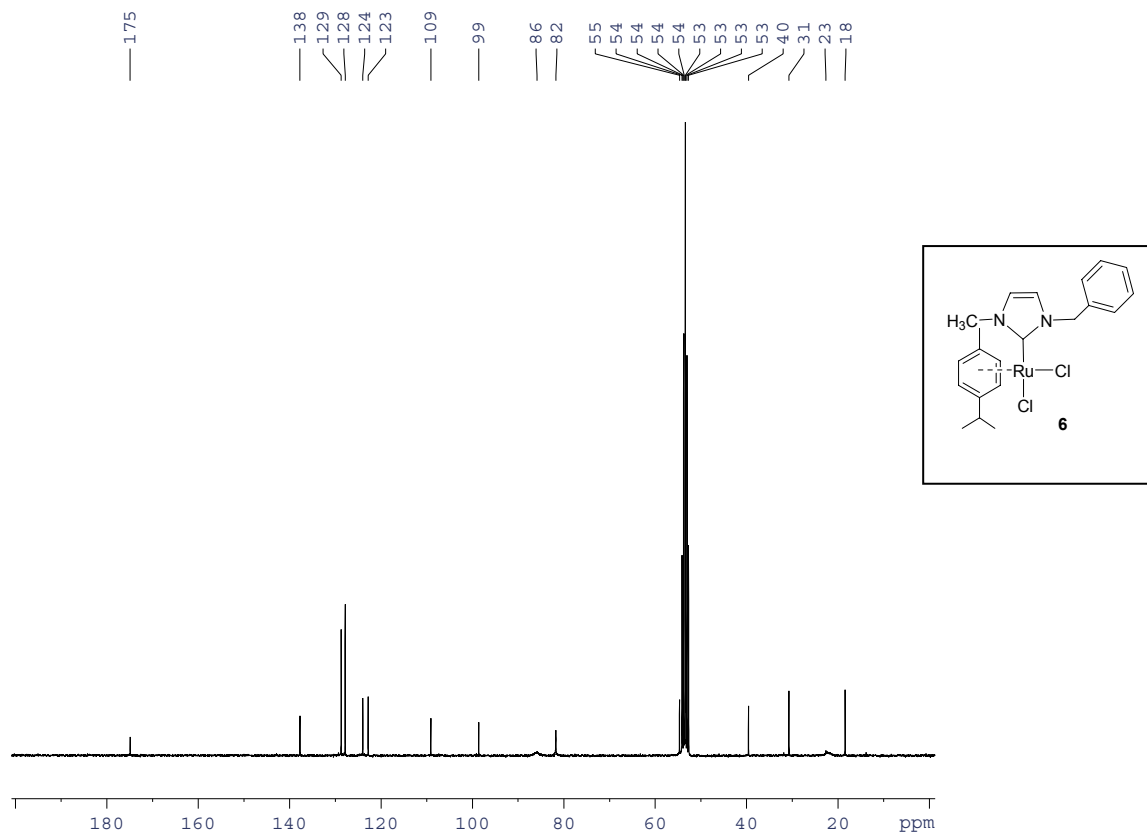

Supplement: b900136k.pdf [file b900136k.pdf]
